# Supplementary material for: Sodium doping in brookite TiO2 enhances its photocatalytic activity
Source: publisher site journal article supplement (doi:10.3762/bjnano.13.52), 2022-07-05
Supplement: Additional file 1 [file 2190-4286-13-52-S1.pdf]

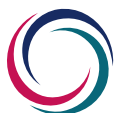

## Supporting Information

for

### **Sodium doping in brookite TiO<sub>2</sub> enhances its photocatalytic activity**

Boxiang Zhuang, Honglong Shi, Honglei Zhang and Zeqian Zhang

*Beilstein J. Nanotechnol.* **2022**, *13*, 599–609. [doi:10.3762/bjnano.13.52](https://doi.org/10.3762/bjnano.13.52)

## Additional figures

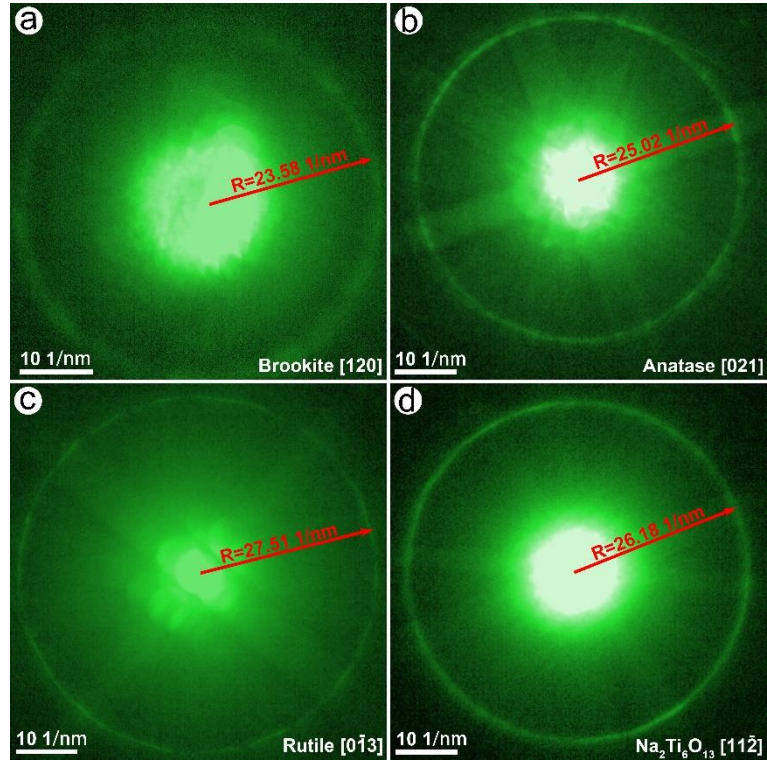

**Figure S1:** High-order Laue zone patterns of (a) brookite, (b) anatase, (c) rutile, and (d)  $\text{Na}_2\text{Ti}_6\text{O}_{13}$ , corresponding to the SAED patterns in Figure 4c<sub>1</sub>–4c<sub>4</sub>.

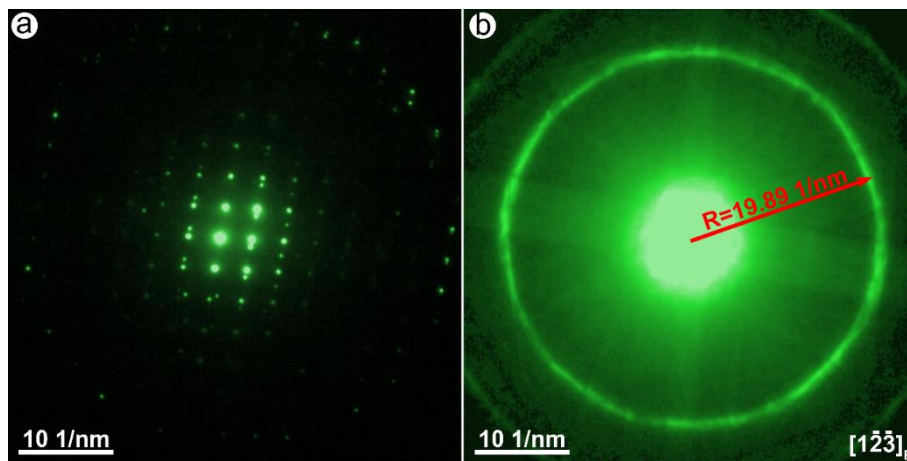

**Figure S2:** The SAED and high-order Laue zone patterns of the brookite crystallite calcinated at 800 °C, corresponding to the HRTEM image and the Fourier diffractogram in Figure 6c–6d.

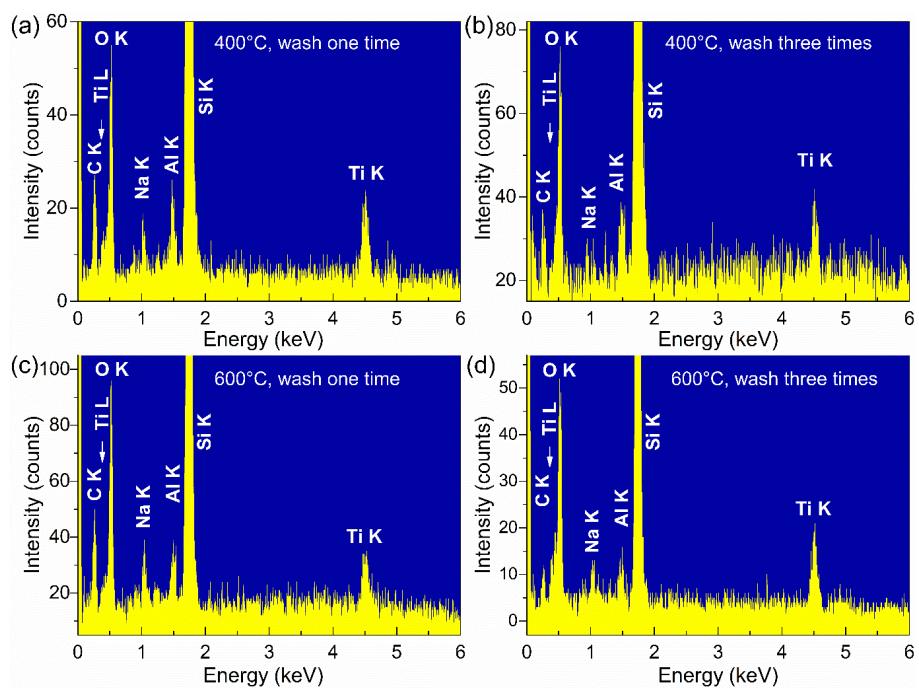

**Figure S3:** Comparison of the Na content of the as-obtained brookite when the hydrothermal reaction precipitates were centrifuged and washed (as described in the Experimental Section) one and three times, and then calcinated at 400 and 600 °C, respectively. It indicates that the Na content of the brookite clearly decreases after being washed three times.

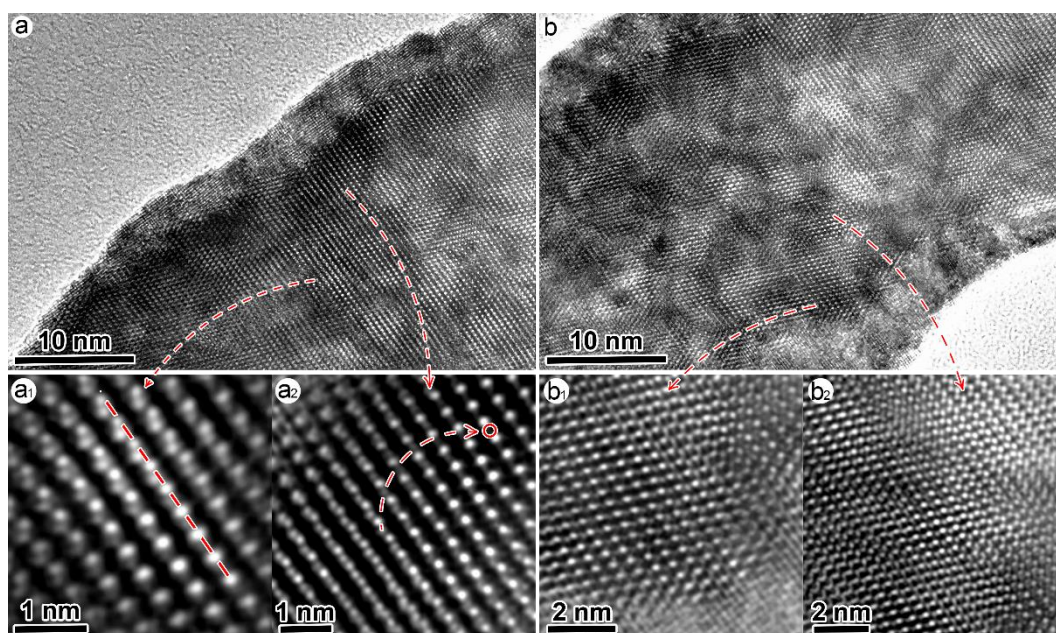

**Figure S4:** The HRTEM images of the brookite crystallite calcinated at 400 °C. There is a large number of (a<sub>1</sub>) local lattice distortions, (a<sub>2</sub>) interstitial atoms and atomic vacancies, and (b<sub>1</sub>–b<sub>2</sub>) complex defects.
